# Supplementary material for: CrxRdy Cat: A Large Animal Model for CRX-Associated Leber Congenital Amaurosis
Source: PubMed Central journal article supplement — Invest Ophthalmol Vis Sci. 2016 Jul 15;57(8):3780–92. doi: 10.1167/iovs.16-19444 (PMC4960999; doi:10.1167/iovs.16-19444), 2016-07-15
Supplement: i1552-5783-57-8-3780-s01.pdf [file i1552-5783-57-8-3780-s01.pdf]

## Supplementary Material legends

**Supplementary Figure S1. List of the *CRX* human mutations leading to the production of a premature stop codon at amino acid 185 compared to the human wild-type and feline mutant sequence.**

**Supplementary Figure S2. Retinal regions imaged by SD-OCT.** Cross sectional retinal images were captured for measurement of retinal layer thicknesses at the following regions (as indicated on the fundus image by an asterisk): the *area centralis*; 4 optic nerve diameters from the optic nerve edge superiorly, inferiorly, temporally and nasally.

**Supplementary Figure S3. Sites of retinal sampling for qRT-PCR.** **A.** For the 2-week-old kittens, due to the small globe size, retina was collected from two regions as indicated (central and peripheral retinal regions). **B.** In the 6, 12 and 20 weeks of age kittens retinal biopsies were collected from the indicated five regions (*area centralis* – AC; inferior mid-peripheral – Inf MP; inferior far-peripheral – Inf FP; superior mid-peripheral – Sup MP; and superior far-periphery – Sup FP).

**Supplementary Figure S4. TR, REC+, ONL and IR layer thicknesses** on SD-OCT images, four optic nerve distance from the optic nerve rim itself **A. Superiorly, B. Inferiorly, C. Temporally and D. Nasally** of *Cr<sup>x</sup><sup>Rdy/+</sup>* kittens normalized to control WT kittens at 4, 6, 8, 10, 12, 15, 20 weeks-old and 6 months of age.

The ONL and REC<sup>+</sup> thicknesses showed thinning with age in *Crx*<sup>Rdy/+</sup> kittens compared to WT. TR was not significantly thinned until 6 months of age inferiorly. Conversely, the IR became thicker in *Crx*<sup>Rdy/+</sup> kittens compared to the wild-type kittens in all regions from 10 weeks of age.

**Supplementary Figure S5. Immunolabeling of the retina for S cones and inner retinal cells.**

Frozen sections of central retina labeled with PNA combined with S-opsin, and with GFAP, and PKCalpha.

The *Crx*<sup>Rdy/+</sup> retina showed a lack of S-opsin staining cells. Cone nuclei (PNA positive) became mislocalized to the subretinal space but did not stain for S-opsin (indicated by white arrowheads in the bottom panel – high magnification view). There was marked Müller cell activation as indicated by GFAP upregulation at 12 and 20 weeks of age. Rod bipolar cells were labeled by PKCalpha and showed dendrite retraction in the *Crx*<sup>Rdy/+</sup> retina.

Key: OS= Photoreceptor Outer segment, IS= Photoreceptor Inner segment, ONL= Outer Nuclear Layer, OPL= Outer Plexiform Layer, INL= Inner Nuclear Layer, IPL= Inner Plexiform Layer, GCL/NFL= Ganglion Cell Layer/Nerve Fiber Layer; White arrow head= Mislocalized photoreceptor nuclei.

**Supplementary Figure S6. Western blot for Crx protein in retinal nuclear and cytoplasmic extracts from 2 week old kittens.**

Note that the truncated mutant Crx protein was exclusively detected in the nuclear extract from the *Crx*<sup>Rdy/+</sup> kitten and was at a higher level than the wild-type protein (immunolabeled with anti-Crx antibody 119b1).

Beta-actin was used as protein loading control.

**Supplementary Figure S7. Dual-Luciferase assays for CRX transactivation activity on mouse *Crx-Luc* reporter.**

Crx auto-activation ability of WT or mutant Crx protein on its own promoter *Crx* (containing 2 binding sites within 500-bp upstream region of the mouse *Crx* gene) was tested using HEK293 cells transfected by plasmids containing the 500bp mouse *Crx* promoter-luciferase reporter (*mCrx-Luc*) and the indicated Crx protein expression vector. Comparing to *pcDNA3.1his* control, only *pCAGIG-feline Crx WT* significantly activated the *mCrx-Luc* reporter. *pCAGIG-feline Crx<sup>Rdy</sup> mutant* did not show any transactivation compared to the control vector.

P-values indicate as followed: \*\* $P < 0.01$  and \*\*\* $P < 0.001$ .

**Supplementary Table S1. List of antibodies used for IHC – their origins and dilutions.**

**Supplementary Table S2. Primer sequences for qRT-PCR assays.**

CRX 1... 135:           PLGISDSYSPPLPGPSGSPPTTAVATVSIWSPASESPLPEAQRAGLVASGPSLTSAPYAMTYAPASA 200.....299

CRX pI138d1 (1) :       PLGTQIPTVPLCFAPQAPQPRQWPLCPGSAQPQSPCLRRSGLGWWPQGR-  
CRX pS141d1 (2) :       PLGISDPTVPLCFAPQAPQPRQWPLCPGSAQPQSPCLRRSGLGWWPQGR-  
CRX pS143d2i1 (3) :     PLGISDSYAPLCFAPQAPQPRQWPLCPGSAQPQSPCLRRSGLGWWPQGR-  
CRX pF153d1 (4, 5) : PLGISDSYSPPLPGPSGSPQPRQWPLCPGSAQPQSPCLRRSGLGWWPQGR-  
CRX pE168d1 (6) :       PLGISDSYSPPLPGPSGSPPTTAVATVSIWSPASSPLCLRRSGLGWWPQGR-  
CRX pF170d1 (7) :       PLGISDSYSPPLPGPSGSPPTTAVATVSIWSPASESPCLRRSGLGWWPQGR-  
CRX pA174d1 (8) :       PLGISDSYSPPLPGPSGSPPTTAVATVSIWSPASESPLPERSGLGWWPQGR-  
CRX pA177d1 (9) :       PLGISDSYSPPLPGPSGSPPTTAVATVSIWSPASESPLPEAQRAGLVASGPSL-  
CRX pA181d1 (10) :      PLGISDSYSPPLPGPSGSPPTTAVATVSIWSPASESPLPEAQRAGLVASGPSL-  
  
fCrX pA182d1 (11) :     PLGISDSYSPPLPGPSVSPPTSAVATVSIWSPASESPLPEAQRAGLVASGPSL-

1. Nichols LL, 2nd, Alur RP, Boobalan E, et al. Two novel CRX mutant proteins causing autosomal dominant Leber congenital amaurosis interact differently with NRL. *Hum Mutat.* 2010;31:E1472-1483.
2. Zou X, Yao F, Liang X, et al. De novo mutations in the cone-rod homeobox gene associated with leber congenital amaurosis in Chinese patients. *Ophthalmic Genet.* 2015;36:21-26.pl138d1.
3. Stone EM. Leber congenital amaurosis - a model for efficient genetic testing of heterogeneous disorders: LXIV Edward Jackson Memorial Lecture. *Am J Ophthalmol.* 2007;144:791-811.
4. Wang P, Guo X, Zhang Q. Further evidence of autosomal-dominant Leber congenital amaurosis caused by heterozygous CRX mutation. *Graefes Arch Clin Exp Ophthalmol.* 2007;245:1401-1402.
5. Ziviello C, Simonelli F, Testa F, et al. Molecular genetics of autosomal dominant retinitis pigmentosa (ADRP): a comprehensive study of 43 Italian families. *J Med Genet.* 2005;42:e47.
6. Freund CL, Gregory-Evans CY, Furukawa T, et al. Cone-rod dystrophy due to mutation in a novel photoreceptor-specific homeobox gene (CRX) essential for maintenance of the photoreceptor. *Cell.* 1997;91:543-553.
7. Perrault I, Hanein S, Gerber S, et al. Evidence of autosomal dominant Leber congenital amaurosis (LCA) underlain by a CRX heterozygous null allele. *J Med Genet.* 2003;40:e90.
8. Nakamura M, Ito S, Miyake Y. Novel de novo mutation in CRX gene in a Japanese patient with leber congenital amaurosis. *Am J Ophthalmol.* 2002;134:465-467.
9. Koenekoop RK, Loyer M, Dembinska O, Beneish R. Visual improvement in Leber congenital amaurosis and the CRX genotype. *Ophthalmic Genet* 2002;23:49-59.
10. Zhang Q, Li S, Guo X, et al. Screening for CRX gene mutations in Chinese patients with Leber congenital amaurosis and mutational phenotype. *Ophthalmic Genet* 2001;22:89-96.
11. Menotti-Raymond M, Deckman KH, David V, Myrkalo J, O'Brien SJ, Narfstrom K. Mutation discovered in a feline model of human congenital retinal blinding disease. *Invest Ophthalmol Vis Sci.* 2010;51:2852-2859.

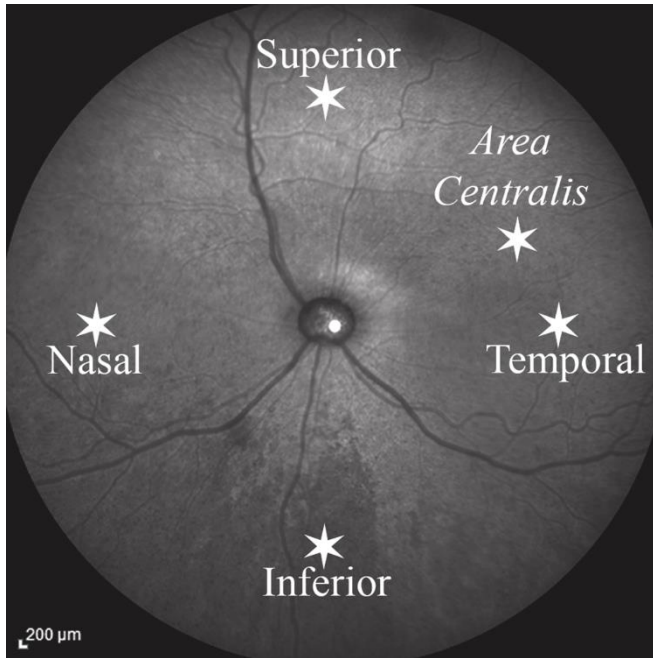

Supplementary Figure S2

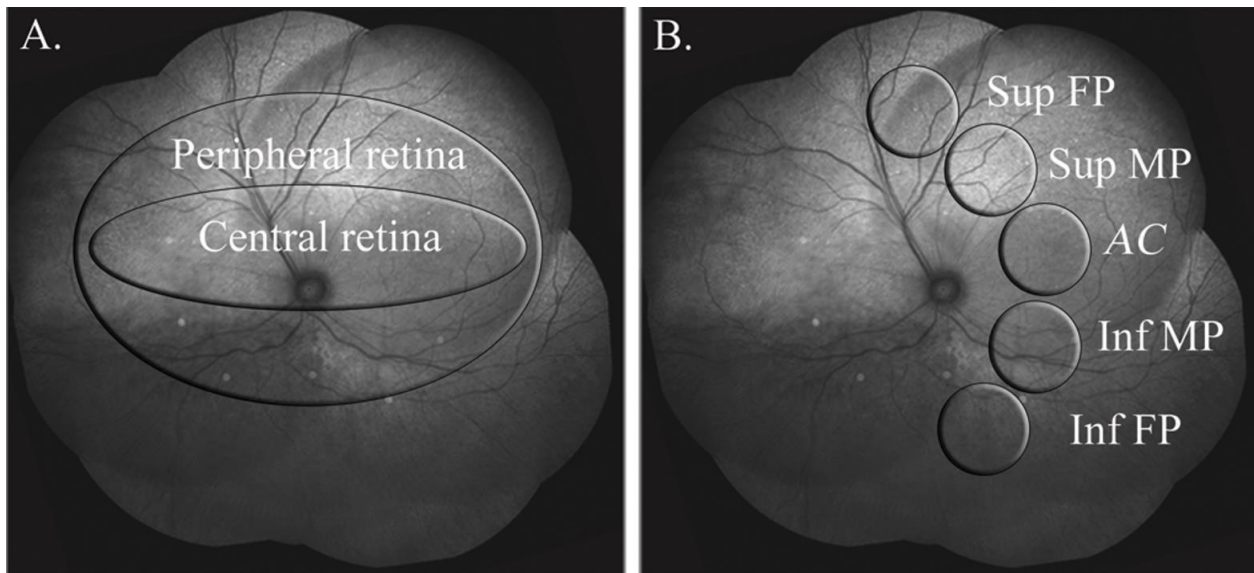

Supplementary Figure S3

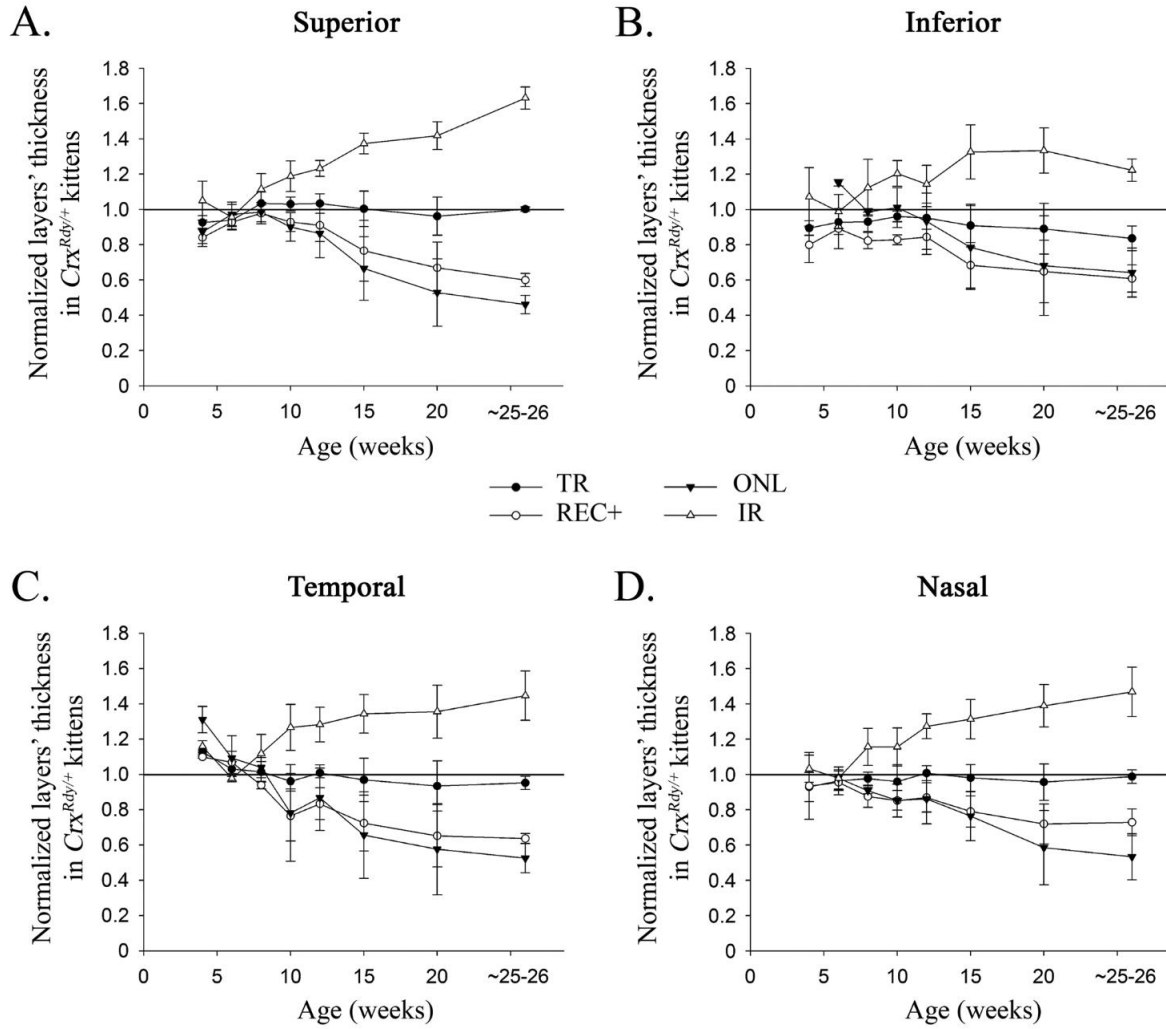

Supplementary Figure S4

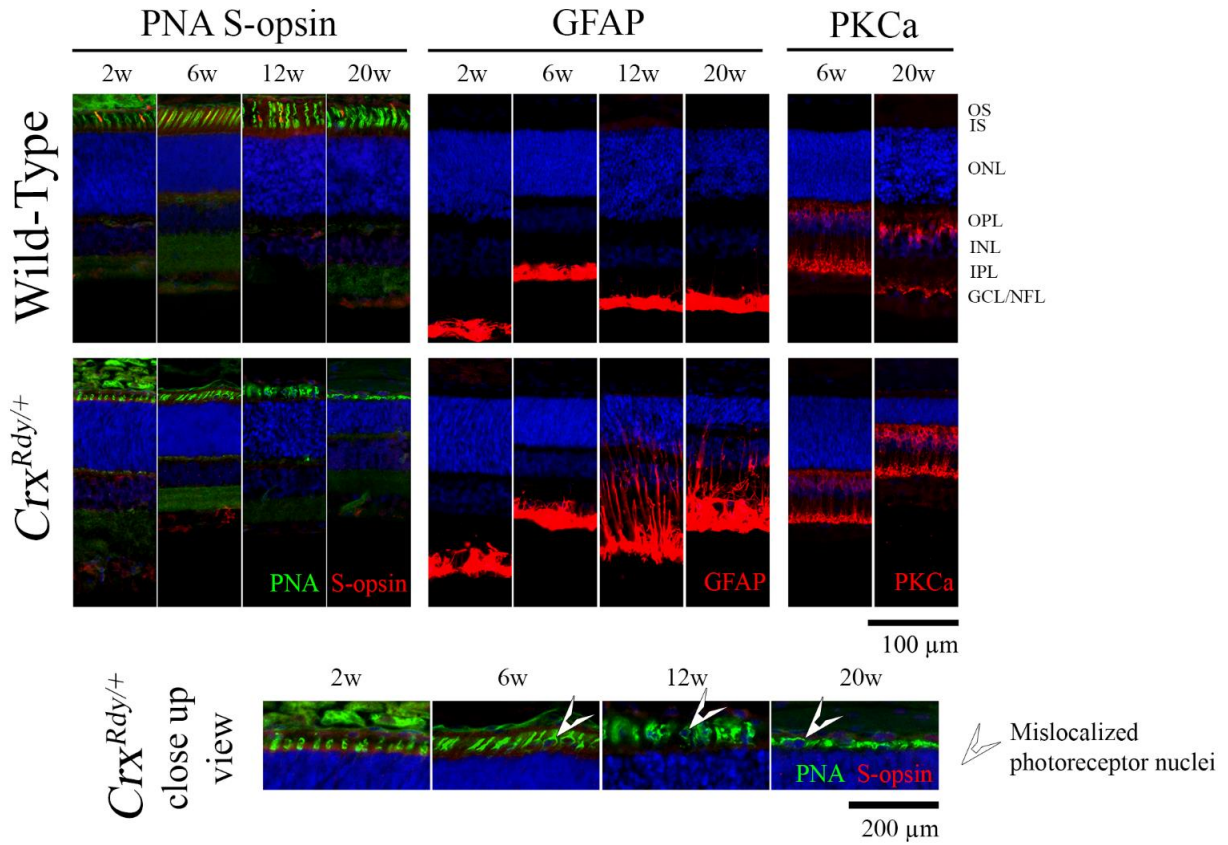

Supplementary Figure S5

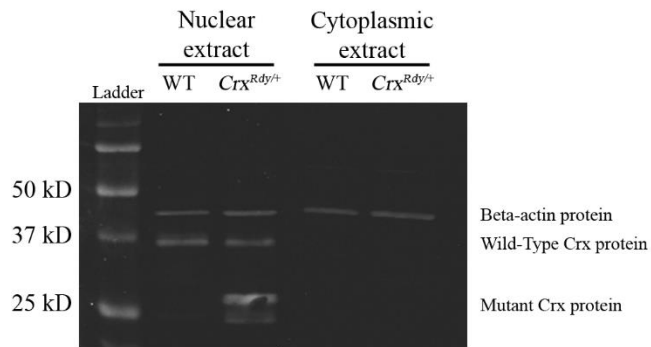

Supplementary Figure S6

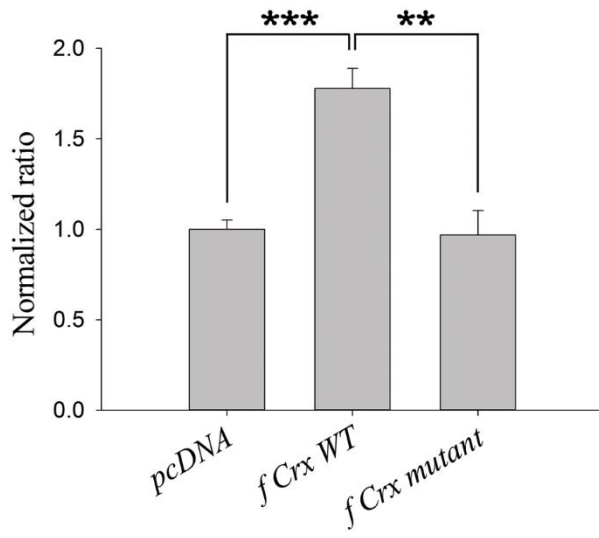

Supplementary Figure S7



**Supplementary Table S1. List of antibodies used for IHC – their origins and dilutions.**

| <b>Antibody – Source</b>                                                                                                       | <b>Type</b>            | <b>Primary Dilution</b> | <b>Secondary Antibody – Source</b>                                                        | <b>Secondary Dilution</b> |
|--------------------------------------------------------------------------------------------------------------------------------|------------------------|-------------------------|-------------------------------------------------------------------------------------------|---------------------------|
| <b>hCAR</b><br>(Human cone arrestin)<br>Dr. Cheryl Craft; LUMIJ,<br>University of Southern California,<br>Los Angeles, CA, USA | Polyclonal<br>rabbit   | 1:10,000                | Alexa Fluor 488 Goat anti-<br>rabbit IgG<br>Life technologies,<br>Carlsbad, CA, USA       | 1:500                     |
| <b>PNA</b><br>(Biotinylated Peanut Agglutinin)<br>Vector Labs Inc., Burlin-game, CA,<br>USA                                    | Biotinylated<br>Lectin | 1:500                   | Alexa Fluor 488<br>Streptavidin<br>Life technologies,<br>Carlsbad, CA, USA                | 1:500                     |
| <b>ML-opsin</b><br>(Anti-Opsin, Red/Green; Medium/<br>Long wavelength cone opsin)<br>Millipore Corp., Billerica, MA, USA       | Polyclonal<br>rabbit   | 1:1,000                 | Alexa Fluor 568 or 594<br>Goat anti-rabbit IgG<br>Life technologies,<br>Carlsbad, CA, USA | 1:500                     |
| <b>S-opsin</b><br>(Anti-Opsin, Blue; Short wavelength<br>cone opsin)<br>Millipore Corp., Billerica, MA, USA                    | Polyclonal<br>rabbit   | 1:1,000                 | Alexa Fluor 568 or 594<br>Goat anti-rabbit IgG<br>Life technologies,<br>Carlsbad, CA, USA | 1:500                     |
| <b>RetP1</b><br>(Rhodopsin Ab-1)<br>Thermo Scientific, Rockford, IL,<br>USA                                                    | Monoclonal<br>mouse    | 1:2                     | Alexa Fluor 594 Rabbit<br>anti-mouse IgG<br>Life technologies,<br>Carlsbad, CA, USA       | 1:500                     |
| <b>GFAP</b><br>(Anti-Glial Fibrillary Acidic Protein)<br>Cell Signaling Technology Inc.,<br>Danvers, MA, USA                   | Monoclonal<br>mouse    | 1:300                   | Alexa Fluor 594 Rabbit<br>anti-mouse IgG<br>Life technologies,<br>Carlsbad, CA, USA       | 1:500                     |
| <b>PKCa</b><br>(Protein Kinase C-alpha)<br>BD Biosciences, San Jose, CA, USA                                                   | Monoclonal<br>mouse    | 1:500                   | Alexa Fluor 594 Rabbit<br>anti-mouse IgG<br>Life technologies,<br>Carlsbad, CA, USA       | 1:500                     |

**Supplementary Table S2. Primer sequences for qRT-PCR assays.**

| <b>Primer name</b> | <b>Forward primer</b>         | <b>Reverse primer</b>         | <b>Amplicon size (bp)</b> | <b>Annealing temperature (°C)</b> |
|--------------------|-------------------------------|-------------------------------|---------------------------|-----------------------------------|
| <i>Crx Total</i>   | 5' AAGACTCAGTACCCGGATGTGTA 3' | 5' GGGGCTGTAGGAGTCTGAGAT 3'   | 223                       | 60                                |
| <i>Arr3</i>        | 5' CGTTGTCCTGTATTCCCTAGAC 3'  | 5' GCTAGAGGCCAGATTAGTATCAC 3' | 190                       | 60                                |
| <i>Rho</i>         | 5' GGTGCCCTACGCCAGCGTG 3'     | 5' CAGTGGGTTCTTGCCACAG 3'     | 190                       | 60                                |
| <i>Tubalb</i>      | 5' GCTCTATTGCCTGGAACACG 3'    | 5' CATCTTCCTTGCCCGTGATG 3'    | 230                       | 60                                |
| <i>GAPDH</i>       | 5' GGTCTTCACCACCATGGAGA 3'    | 5' TGGACTGTGGTCATGAGTCC 3'    | 237                       | 60                                |
